# Supplementary material for: Application value of cardiac magnetic resonance image fusion technique in patients with acute myocardial infarction
Source: Research Square preprint supplement (doi:10.21203/rs.3.rs-2172080/v1), 2022-10-27
Supplement: Supplementary file 1 [file 802bd779e1e4350f2d3c0109.xlsx]

## Sheet: data
Serial number	MVO(1=yes 0=no)	myocardial infarction (subendocardial=0,transmural=1)	Time from PCI to CMR (days)	Time from symptom onset to PCI (h)	Male	Age (years)	Culprit artery	Current Smoker (1=yes 0=no)	Hypertension (1=yes 0=no)	Diabetes (1=yes 0=no)	Dyslipidemia (1=yes 0=no)	Heart rate (bpm)	Systolic blood pressure (mmHg)	Diastolic blood pressure (mmHg)	Heart failure Killip class	LGE positive rate (1=yes 0=no)	DWI positive rate (1=yes 0=no)	Cine-DWI positive rate (1=yes 0=no)	①Infarct size (LGE)(%LV)	①Edema area (DWI)(%LV)	①Edema area (cine-DWI)(%LV)	①Edema myocardial score (DWI)	①Edema myocardial score (cine-DWI)	①Normal myocardial score (DWI)	①Normal myocardial score (cine-DWI)	①Overall myocardial score (DWI)	①Overall myocardial score (cine-DWI)	②Infarct size (LGE)(%LV)	②Edema area (DWI)(%LV)	②Edema area (cine-DWI)(%LV)	②Edema myocardial score (DWI)	②Edema myocardial score (cine-DWI)	②Normal myocardial score (DWI)	②Normal myocardial score (cine-DWI)	②Overall myocardial score (DWI)	②Overall myocardial score (cine-DWI)
1	1	1	5.20833	9	1	69	LCX	1	0	0	0	119	120	72	1	1	1	1	17.2	18.2	20.3775	5	5	4	5	9	10	17.9	16.4	19.8	4	5	4	5	8	10
2	0	1	3.33333	5	1	48	RCA	0	1	0	0	106	169	126	1	1	1	1	18.9	24.3	25.688	4	4	2	4	6	8	18.5	22.5	24.96	4	5	3	4	7	9
3	1	1	3.16667	4	1	49	LAD	0	0	0	1	115	140	90	1	1	1	1	24.9	27.9	32.851	5	5	2	3	7	8	24.4	27.3	31.92	5	5	2	2	7	7
4	1	1	3.08333	4	0	69	LAD	0	0	1	0	50	126	70	1	1	1	1	29.1	31.2	33.55	2	3	4	5	6	8	28.1	33.4	32.64	3	4	4	5	7	9
5	0	1	3.75	5	1	63	RCA	1	0	1	0	82	122	69	1	1	1	1	17.6	16.8	24.5765	3	4	2	4	5	8	18.6	16.7	23.88	3	5	2	3	5	8
6	0	1	5.20833	5	0	61	RCA	0	1	0	0	85	133	83	1	1	1	1	16.2	14.9	19.3895	3	3	2	4	5	7	15.2	15.6	18.84	2	3	2	4	4	7
7	0	0	3.83333	8.5	1	74	RCA	0	1	0	0	70	135	78	1	1	1	1	24.8	20.3	31.9865	4	3	2	4	6	7	23.8	21.7	31.08	4	4	3	4	7	8
8	0	1	4.54167	6	1	48	RCA	0	1	1	1	78	110	72	1	1	1	1	13	13.5	15.6845	3	4	3	4	6	8	13.9	14.6	15.24	3	3	2	3	5	6
9	0	1	1.66667	5	1	68	RCA	1	1	0	0	66	129	97	1	1	0	1	14.9		17.42	1	2	1	4	2	6	13.9		16.08	1	3	1	4	2	7
10	1	1	2.25	12	0	70	LCX	0	1	1	0	64	109	77	1	1	1	1	22.5	23.4	30.7125	4	4	2	3	6	7	22.2	24.9	27	4	4	2	3	6	7
11	1	1	6	11.5	1	69	LAD	0	0	0	0	82	139	89	1	1	1	1	25.8	29.1	33.4	5	5	3	5	8	10	25.1	28.2	31.32	5	5	3	5	8	10
12	0	0	2.33333	11.5	0	62	LAD	0	0	0	0	72	120	71	2	1	1	1	16.2	25.1	24.024	3	4	2	4	5	8	16.9	22.9	21.12	3	5	2	3	5	8
13	0	1	4.58333	9	1	77	LAD	0	0	0	0	80	148	80	1	1	1	1	19.9	26.1	24.7065	5	5	2	5	7	10	19.4	22.6	21.72	5	5	3	5	8	10
14	0	0	5.16667	8	1	64	RCA	0	0	0	0	72	143	69	1	1	1	1	15.9	19.3	33.5	4	3	3	3	7	6	15.4	18.5	19.56	4	4	2	3	6	7
15	0	1	7.75	5	1	30	LAD	1	0	0	0	60	115	72	1	1	0	0	11.1			1	1	1	4	2	5	11.7			1	1	1	3	2	4
16	0	0	5.75	4	1	64	RCA	0	1	0	0	48	45	31	2	1	1	1	22.8	30.1	31.5796	5	5	3	4	8	9	23.8	29.9	30.12	5	5	3	4	8	9
17	1	1	6.125	3	1	45	LAD	1	1	0	0	78	150	100	2	1	1	1	24.5	22.6	31.3196	4	5	2	3	6	8	24.2	22.8	30.12	5	5	2	3	7	8
18	0	1	6.125	3	0	29	LCX	0	1	0	0	78	120	66	1	1	1	1	12.7	21.4	20.2	3	2	2	3	5	5	12.2	14.9	14.28	2	3	2	3	4	6
19	0	0	8.75	2	1	61	RCA	0	0	0	0	74	96	52	2	1	1	1	17.2	16.1	22.0064	4	3	3	4	7	7	17.6	21.1	22.08	4	3	2	4	6	7
20	1	1	6.66667	4	1	41	LAD	1	0	0	0	78	136	78	2	1	1	1	31.7	35.9	37.5	5	5	4	5	9	10	30.7	26.1	38.52	5	5	4	5	9	10
21	0	0	6.70833	5.5	1	62	RCA	0	1	0	0	85	165	90	1	1	1	1	19.8	26.7	26.8	5	5	2	4	7	9	19.4	36.7	24.72	5	4	2	3	7	7
22	1	1	7.04167	4	1	64	LAD	0	0	0	0	112	130	90	1	1	1	1	31	39.1	40.3052	4	4	2	3	6	7	31.2	38.6	40.44	4	4	2	2	6	6
23	0	0	3.66667	2	1	49	RCA	0	0	0	0	85	165	90	1	1	1	1	17.9	24.6	24.7572	5	5	2	5	7	10	18.9	24.4	24.84	5	5	3	5	8	10
24	1	1	4.91667	3	1	48	LAD	0	1	0	0	94	147	98	1	1	1	1	22.4	26.8	33.5231	4	5	2	3	6	8	23	26.5	28.92	4	5	2	2	6	7
25	0	0	3.875	8	1	65	RCA	0	1	0	0	76	132	82	1	1	1	1	16	22.1	23.9252	5	4	3	4	8	8	16.7	18.5	20.64	4	4	3	4	7	8
26	0	1	5	5	1	76	RCA	0	0	1	0	72	101	67	1	1	1	1	18.7	25.6	31.5757	4	4	4	5	8	9	20.1	26.9	27.24	4	5	4	5	8	10
27	1	1	5.625	6	1	50	LAD	0	1	0	0	80	144	80	1	1	1	1	28.9	28.7	32.3	5	5	2	4	7	9	31.1	29.4	34.44	5	5	2	4	7	9
28	0	1	7.125	3	1	62	LAD	0	0	0	0	85	162	100	4	1	1	1	32.3	34.8	39.8	4	4	2	3	6	7	34.7	34.1	41.4	4	4	2	3	6	7
29	0	1	6.33333	8	0	83	LAD	0	0	0	0	78	128	72	2	1	1	1	31.9	37.5	41.2	3	5	3	4	6	9	34.3	36.7	40.32	5	5	3	4	8	9
30	0	1	4	5	1	67	RCA	0	1	0	0	53	128	76	1	1	1	1	23.9	32.2	34.5397	4	5	2	4	6	9	25.7	31.7	32.04	4	5	2	3	6	8
31	1	1	4.54167	6	1	40	LAD	1	0	1	0	71	124	84	1	1	1	1	24.3	31	35.7916	5	5	3	4	8	9	26.1	30.3	33.12	5	4	2	3	7	7
32	0	1	4.75	6	1	65	LAD	1	0	0	1	86	116	77	1	1	0	1	24.9		31.2013	1	2	1	2	2	4	25.8		29.16	1	2	1	2	2	4
33	0	0	3.41667	9	0	65	LAD	0	1	1	0	78	150	80	1	1	0	0	8.8			1	1	1	4	2	5	8.3			1	1	1	4	2	5
34	0	1	6.08333	9	1	61	LAD	0	0	1	1	85	105	70	2	1	1	1	25.3	27.6	32.1464	5	5	2	3	7	8	25.1	27.7	33.72	5	5	2	3	7	8
35	1	1	7.625	5	1	47	LAD	0	1	0	0	80	126	70	3	1	1	1	48.6	55.2	56.2224	4	4	3	5	7	9	47.5	56.4	53.52	4	4	3	5	7	9
36	0	1	5.04167	3	0	82	RCA	0	1	0	1	85	145	86	1	1	1	1	24.7	24.1	28.7144	5	5	2	3	7	8	24.8	25.4	30.12	5	5	3	3	8	8
37	1	1	5.95833	8	1	75	LAD	0	0	0	0	85	156	100	2	1	1	1	31.8	53.69	41.3	5	5	2	5	7	10	31.4	25.6	40.56	4	5	2	5	6	10
38	0	0	6.16667	5	1	38	LAD	0	0	1	0	78	138	78	1	1	1	1	24.6	20.3	26.5408	2	2	3	2	5	4	23.9	19.7	27.84	2	2	3	2	5	4
39	1	1	5.125	10.5	1	64	LAD	0	1	0	0	85	135	80	2	1	1	1	35.1	36.4	42.0992	3	3	3	5	6	8	35.5	35.1	44.16	3	3	3	5	6	8
40	0	0	5.20833	9	1	51	LAD	0	0	0	1	58	125	80	1	1	1	1	39	42.3	45.3	5	5	1	4	6	9	39.5	46.5	51.24	5	5	1	4	6	9
41	0	1	6.9	12.5	1	60	LAD	0	0	0	0	90	140	110	2	1	1	1	22.6	30.6	30.5448	4	4	2	4	6	8	23.7	31.6	32.04	4	4	2	3	6	7
42	0	0	6.25	11.5	1	39	LCX	0	1	0	0	87	131	94	1	1	1	1	23.8	24.9	29.2864	4	5	3	3	7	8	24.3	26.8	30.72	4	5	3	2	7	7
43	1	1	6.125	3	1	58	LAD	1	0	1	0	76	146	84	1	1	1	1	30.1	39.7	42.9	5	5	2	4	7	9	31.9	37.7	40.08	5	5	3	4	8	9
44	1	1	4.25	5	1	66	LAD	0	0	0	0	57	102	74	1	1	1	1	42.5	44.5	54.8	3	4	1	3	4	7	45.2	36.7	51.84	3	4	1	3	4	7
45	1	1	4.70833	11	0	55	RCA	0	1	1	0	72	118	78	1	1	1	1	26.5	20.1	37.57	3	2	2	3	5	5	25.7	22.2	32.16	2	2	2	3	4	5
46	0	0	3.58333	7	0	77	LAD	0	1	0	0	77	135	76	1	1	1	1	49.1	50.1	57.2	5	4	4	5	9	9	47.6	38.1	60.24	5	4	4	5	9	9
47	1	1	6.33333	10.5	1	52	LAD	0	1	0	0	90	136	76	1	1	1	1	45.3	45.6	48.3	4	3	2	4	6	7	33.5	41.5	48.6	3	3	3	4	6	7
48	1	1	3.625	4	1	73	LAD	0	0	0	0	74	124	76	1	1	1	1	51.3	37.5	48.7	4	4	4	5	8	9	53.5	48	62.76	5	4	4	5	9	9
49	1	0	6.875	9	0	76	RCA	0	1	1	0	66	125	53	1	1	1	1	32.3	46.2	48.1	4	5	2	4	6	9	46.6	53.9	41.52	4	4	2	3	6	7
50	0	1	4.875	5	0	65	RCA	0	1	0	0	54	80	53	1	1	1	1	24.8	31.6	35.23	5	4	3	4	8	8	24.5	26.1	29.76	4	4	3	4	7	8
51	0	1	5.5	4	1	70	LAD	0	0	0	0	72	118	66	2	1	1	1	27.6	45.2	46.8	4	5	4	5	8	10	27.1	34.5	31.44	4	5	4	5	8	10
52	0	1	6.54167	8	1	32	LCX	0	1	0	0	100	183	110	1	1	1	1	20.1	29.8	27.17	3	3	2	5	5	8	19.4	24.7	24.12	2	4	3	5	5	9
